# Supplementary material for: Role of vitamin B12 and folic acid in treatment of Alzheimer’s disease: a meta-analysis of randomized control trials
Source: Aging (Albany NY). 2024 May 2;16(9):7856–69. doi: 10.18632/aging.205788 (PMC11132008; doi:10.18632/aging.205788)
Supplement: Supplementary Figures [file aging-16-205788-s001.pdf]

## SUPPLEMENTARY FIGURES

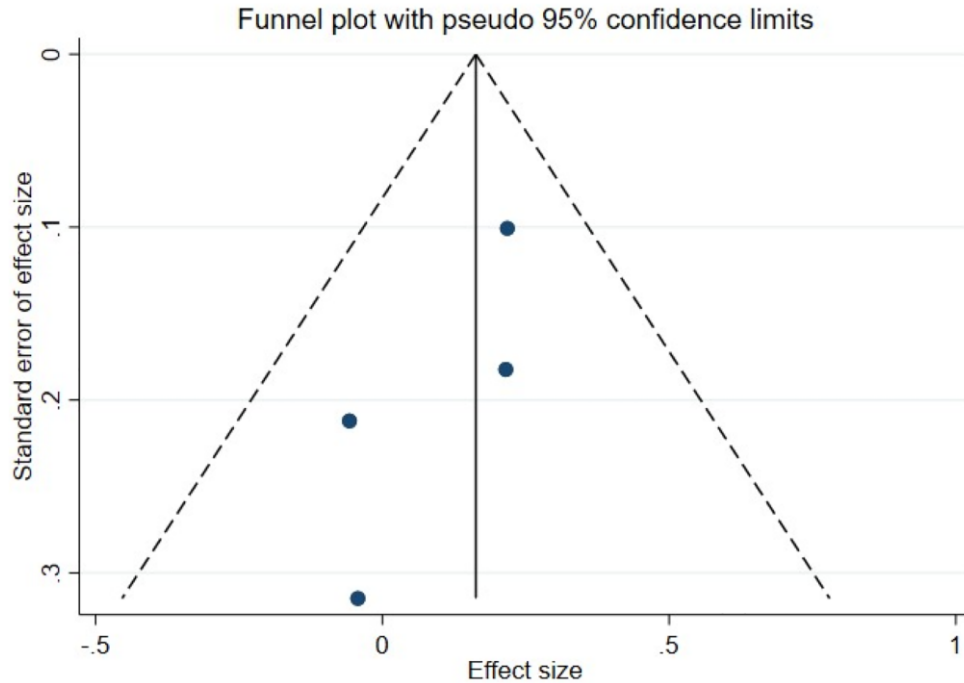

**Supplementary Figure 1. Funnel plot of effect of vitamin B12 and folic acid on change in MMSE score.** Egger's test (intercept =  $-1.38$ ,  $t = -1.84$ , 2-tailed  $p = 0.207$ ) and Begg's test ( $z = 1.02$ ,  $p = 0.308$ ) did not reveal any publication bias.

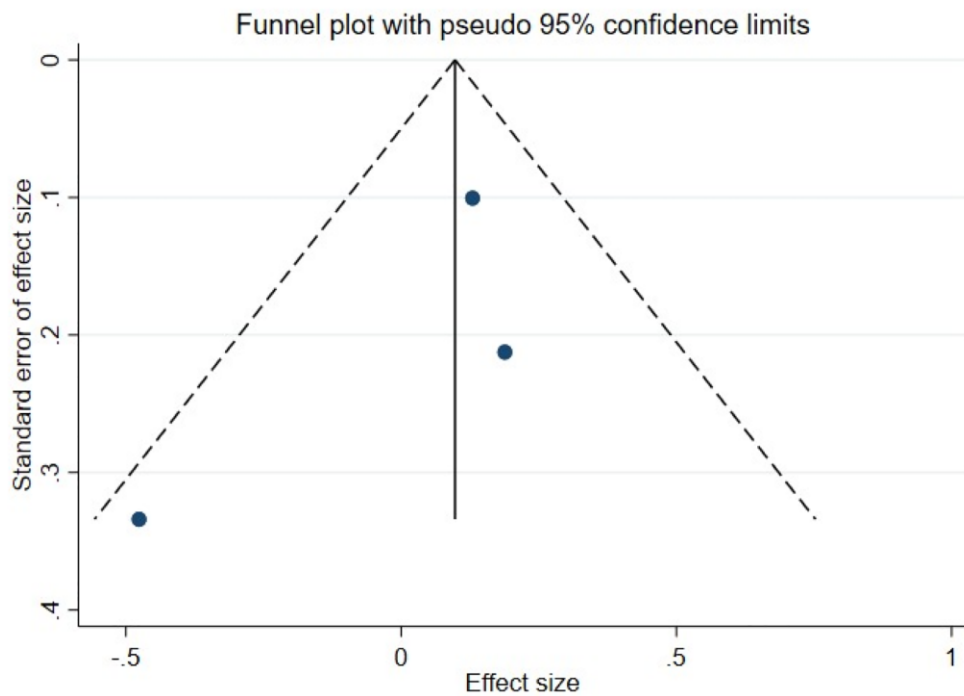

**Supplementary Figure 2. Funnel plot of effect of vitamin B12 and folic acid on change in ADAS-Cog score.** Egger's test (intercept =  $-1.61$ ,  $t = -0.98$ , 2-tailed  $p = 0.508$ ) and Begg's test ( $z = 1.04$ ,  $p = 0.296$ ) did not reveal any publication bias.

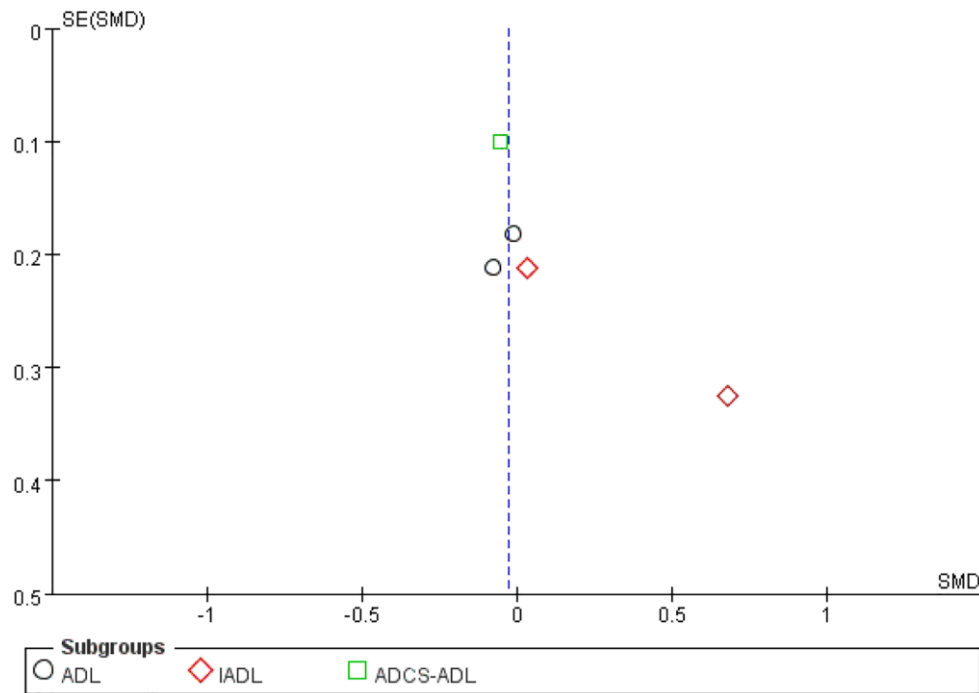

**Supplementary Figure 3. Funnel plot of effect of vitamin B12 and folic acid on change in daily life functions.**

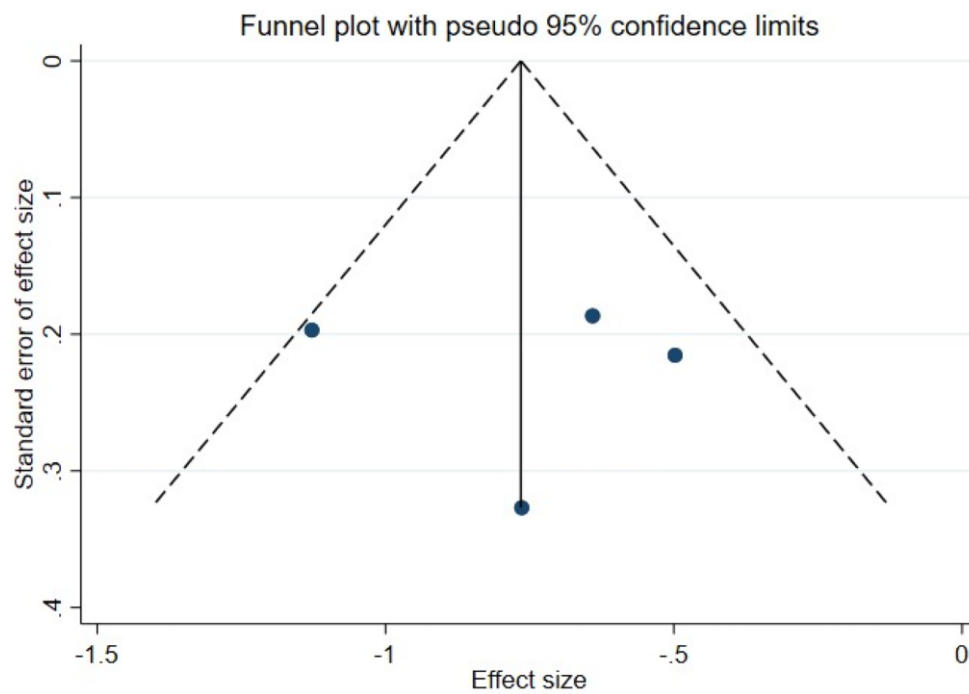

**Supplementary Figure 4. Funnel plot of effect of vitamin B12 and folic acid on change in blood homocysteine level.** Egger's test (intercept = 0.48,  $t = 0.11$ , 2-tailed  $p = 0.921$ ) and Begg's test ( $z = -0.34$ ,  $p = 1.00$ ) did not reveal any publication bias.
