# Supplementary material for: Role of vitamin B12 and folic acid in treatment of Alzheimer’s disease: a meta-analysis of randomized control trials
Source: publisher site journal article supplement (doi:10.18632/aging.205788), 2024-05-02
Supplement: Supplementary file [file aging-v16i9-205788-supplementary-material-SD2.pdf]

## SUPPLEMENTARY TABLE

**Supplementary Table 1. Search strategy.**

| <b>PubMed</b> |                                                                                                                                                                                                                                                                                                                                                                                           |                         |
|---------------|-------------------------------------------------------------------------------------------------------------------------------------------------------------------------------------------------------------------------------------------------------------------------------------------------------------------------------------------------------------------------------------------|-------------------------|
| 1             | Search: (((vitamin[Title/Abstract] OR (vitamin B[Title/Abstract])) OR (folate[Title/Abstract])) OR (folic acid[Title/Abstract]))                                                                                                                                                                                                                                                          | <a href="#">2600302</a> |
| 2             | Search: (((alzheimer[Title/Abstract] OR (alzheimer's[Title/Abstract])) OR (dementia[Title/Abstract])) OR (cognition[Title/Abstract])) OR (cognitive[Title/Abstract])                                                                                                                                                                                                                      | <a href="#">675368</a>  |
| #1 AND #2     | Search: #1 AND #2<br>("vitamin"[Title/Abstract] OR "vitamin b"[Title/Abstract] OR "folate"[Title/Abstract] OR "folic acid"[Title/Abstract]) AND ("alzheimer"[Title/Abstract] OR "alzheimer's"[Title/Abstract] OR "dementia"[Title/Abstract] OR "cognition"[Title/Abstract] OR "cognitive"[Title/Abstract])                                                                                | <a href="#">5646</a>    |
| RCT           | Search: #1 AND #2 Filters: Randomized Controlled Trial<br>(("vitamin"[Title/Abstract] OR "vitamin b"[Title/Abstract] OR "folate"[Title/Abstract] OR "folic acid"[Title/Abstract]) AND ("alzheimer"[Title/Abstract] OR "alzheimer's"[Title/Abstract] OR "dementia"[Title/Abstract] OR "cognition"[Title/Abstract] OR "cognitive"[Title/Abstract])) AND (randomizedcontrolledtrial[Filter]) | <a href="#">361</a>     |
| <b>Embase</b> |                                                                                                                                                                                                                                                                                                                                                                                           |                         |
| 1             | vitamin:ab,ti OR 'vitamin b':ab,ti OR folate:ab,ti OR 'folic acid':ab,ti                                                                                                                                                                                                                                                                                                                  | <a href="#">333693</a>  |
| 2             | alzheimer:ab,ti OR alzheimers:ab,ti OR dementia:ab,ti OR cognition:ab,ti OR cognitive:ab,ti                                                                                                                                                                                                                                                                                               | <a href="#">896614</a>  |
| #1 AND #2     | #1 AND #2<br>(vitamin:ab,ti OR 'vitamin b':ab,ti OR folate:ab,ti OR 'folic acid':ab,ti) AND (alzheimer:ab,ti OR alzheimers:ab,ti OR dementia:ab,ti OR cognition:ab,ti OR cognitive:ab,ti)                                                                                                                                                                                                 | <a href="#">8375</a>    |
| RCT           | #1 AND #2 AND 'randomized controlled trial'/de                                                                                                                                                                                                                                                                                                                                            | <a href="#">532</a>     |
